# Supplementary material for: Retirement as Risk or Relief? The Role of Timing in Mental, Physical and Cognitive Health Effects of Retirement
Source: Research Square preprint supplement (doi:10.21203/rs.3.rs-7023137/v1), 2025-07-26
Supplement: Supplementary file 1 [file 3af88d6dc8a52af101491f6d.docx]

**Supplementary material**

**Retirement as Risk or Relief?**

**The Role of Timing in Mental, Physical and Cognitive Health Effects of Retirement**

**Table S1**

*Frequency of transitions between retirement status categories across measurement waves*

|  | To | | | |
| --- | --- | --- | --- | --- |
| From | Not retired | Partially retired, do not identify as retiree | Partially retired, identify as retiree | Fully retired |
| Not retired | 5,327 | 859 | 453 | 1,493 |
| Partially retired, do not identify as retiree | 237 | 1,592 | 540 | 467 |
| Partially retired, identify as retiree | 15 | 346 | 1,632 | 864 |
| Fully retired | 68 | 132 | 481 | 13,585 |

*Note*. *N* = 5,875. Diagonal: no change in retirement status across two consecutive waves. Number of individuals constantly not retired: *n* = 644; Constantly partially retired, do not identify as retiree: *n* = 351; Constantly partially retired, identify as retiree: *n* = 404; Constantly fully retired: *n* = 1,113; At least one transition: *n* = 3,363.

**Table S2**

*Correlations (above diagonal), variances (diagonal), and covariances (below diagonal) of demographic characteristics (age, gender, education, relationship status), retirement status, health variables (life satisfaction, quality of life, depressive symptoms, disease burden, reasoning ability, and memory), job satisfaction, and involuntary transition*

|  |  | 1. | 2. | 3. | 4. | 5. | 6. | 7. | 8. | 9. | 10. | 11. | 12. | 13. |
| --- | --- | --- | --- | --- | --- | --- | --- | --- | --- | --- | --- | --- | --- | --- |
| 1. | Agea | 10.71 | 0.01 | 0.00 | -0.02 | 0.63 | 0.10 | 0.06 | -0.03 | 0.07 | 0.02 | 0.14 | 0.09 | 0.02 |
| 2. | Genderb | 0.02 | 0.25 | 0.09 | -0.11 | 0.04 | 0.00 | 0.00 | 0.06 | 0.00 | -0.09 | 0.10 | -0.04 | 0.02 |
| 3. | Educationc | 0.00 | 0.02 | 0.24 | 0.02 | -0.07 | 0.05 | 0.05 | -0.01 | -0.14 | 0.14 | 0.13 | 0.05 | -0.04 |
| 4. | Relationship statusad | -0.03 | -0.02 | 0.00 | 0.16 | 0.01 | 0.23 | 0.16 | -0.20 | -0.07 | 0.03 | -0.01 | 0.09 | -0.14 |
| 5. | Retirement statusa | 2.69 | 0.02 | -0.04 | 0.01 | 1.70 | 0.09 | 0.05 | -0.03 | 0.08 | -0.02 | 0.08 | -0.05 | -0.02 |
| 6. | Life satisfactiona | 2.18 | -0.01 | 0.16 | 0.63 | 0.85 | 47.76 | 0.75 | -0.63 | -0.31 | 0.07 | 0.08 | 0.32 | -0.28 |
| 7. | Quality of lifea | 1.10 | 0.00 | 0.14 | 0.38 | 0.38 | 31.62 | 37.81 | -0.68 | -0.40 | 0.07 | 0.07 | 0.35 | -0.30 |
| 8. | Depressive symptomsa | -0.37 | 0.14 | -0.03 | -0.35 | -0.20 | -18.81 | -17.93 | 18.69 | 0.37 | -0.06 | -0.06 | -0.29 | 0.28 |
| 9. | Disease burdena | 0.89 | 0.00 | -0.25 | -0.11 | 0.37 | -7.96 | -8.91 | 5.84 | 13.94 | -0.04 | -0.03 | -0.16 | 0.24 |
| 10. | Reasoning abilitya | 0.11 | -0.08 | 0.11 | 0.02 | -0.04 | 0.81 | 0.70 | -0.42 | -0.22 | 2.85 | 0.23 | 0.00 | -0.04 |
| 11. | Memorya | 1.02 | 0.12 | 0.16 | -0.01 | 0.25 | 1.26 | 1.03 | -0.54 | -0.25 | 0.88 | 5.51 | 0.01 | -0.05 |
| 12. | Job satisfaction | 0.29 | -0.02 | 0.02 | 0.04 | -0.07 | 2.15 | 2.09 | -1.19 | -0.58 | 0.00 | 0.03 | 1.10 | -0.12 |
| 13. | Involuntary transition | 0.04 | 0.01 | -0.01 | -0.03 | -0.01 | -1.10 | -1.03 | 0.68 | 0.49 | -0.04 | -0.06 | -0.07 | 0.36 |

*Note*. Below diagonal: covariances. Diagonal: variances. Above diagonal: correlation coefficients. aTime-varying. bMale = 0, Female = 1. cPrimary/secondary = 0, Tertiary = 1. dNo partner = 0, With partner = 1.

**Table S3**

*Sensitivity analysis with varying definitions of retirement (pension withdrawal, subjective retirement, stop working) in the effects on life satisfaction*

|  | Life satisfaction | | | | | | | | |
| --- | --- | --- | --- | --- | --- | --- | --- | --- | --- |
|  | Pension withdrawala | | | Subjective retirementb | | | Stop workingc | | |
|  | Est. | 95% CI | *p* | Est. | 95% CI | *p* | Est. | 95% CI | *p* |
| *Fixed effects* | | | | | | | | | |
| Intercept | -0.28 | -0.32, -0.23 | <.001 | -0.27 | -0.31, -0.22 | <.001 | -0.27 | -0.31, -0.22 | <.001 |
| Age at baseline | -0.03 | -0.04, -0.01 | <.001 | -0.02 | -0.03, -0.002 | .03 | -0.01 | -0.02, 0.01 | .22 |
| Age (time-varying) | 0.02 | 0.02, 0.03 | <.001 | 0.02 | 0.02, 0.03 | <.001 | 0.03 | 0.02, 0.03 | <.001 |
| Retirement WP | 0.10 | 0.08, 0.13 | <.001 | 0.10 | 0.08, 0.12 | <.001 | 0.10 | 0.08, 0.12 | <.001 |
| Retirement BP | 0.32 | 0.23, 0.42 | <.001 | 0.19 | 0.11, 0.26 | <.001 | 0.11 | 0.04, 0.18 | .003 |
| Genderd | 0.02 | -0.02, 0.07 | .31 | 0.02 | -0.03, 0.06 | .47 | 0.02 | -0.03, 0.07 | .40 |
| Educatione | 0.10 | 0.05, 0.14 | <.001 | 0.10 | 0.05, 0.15 | <.001 | 0.10 | 0.05, 0.14 | <.001 |
| Relationship statusf | 0.36 | 0.32, 0.39 | <.001 | 0.36 | 0.33, 0.39 | <.001 | 0.36 | 0.33, 0.39 | <.001 |
| Retirement WP × Age | <.001 | -0.01, 0.01 | .96 | -0.02 | -0.03, -0.01 | <.001 | -0.02 | -0.03, -0.02 | <.001 |
| Retirement BP × Age | -0.03 | -0.05, -0.02 | <.001 | -0.04 | -0.05, -0.03 | <.001 | -0.04 | -0.05, -0.03 | <.001 |
| *Random effects (SD)* | | | | | | | | | |
| Intercept | 0.81 | | | 0.81 | | | 0.82 | | |
| Age | 0.07 | | | 0.07 | | | 0.07 | | |
| Retirement WP | 0.33 | | | 0.32 | | | 0.31 | | |
| Residual | 0.48 | | | 0.48 | | | 0.48 | | |
| AIC | 65,337.60 | | | 65,330.06 | | | 65,440.61 | | |
| BIC | 65,480.75 | | | 65,473.21 | | | 65,583.76 | | |

*Note*. Dependent variable standardized (z-score) on baseline distribution to facilitate interpretation. WP = within-person effect, BP = between-person effect, AIC = Akaike Information Criterion, BIC =Bayesian Information Criterion, CI = confidence interval. aRetirement defined by transition from 1 to 2/3/4 in the retirement status variable. bRetirement defined by transition from 1/2 to 3/4 in the retirement status variable. cRetirement defined by transition from 1/2/3 to 4 in the retirement status variable. ePrimary/secondary = 0, Tertiary = 1. fNo partner = 0, With partner = 1.

**Table S4**

*Sensitivity analysis with varying definitions of retirement (pension withdrawal, subjective retirement, stop working) in the effects on quality of life*

|  | Quality of life | | | | | | | | |
| --- | --- | --- | --- | --- | --- | --- | --- | --- | --- |
|  | Pension withdrawala | | | Subjective retirementb | | | Stop workingc | | |
|  | Est. | 95% CI | *p* | Est. | 95% CI | *p* | Est. | 95% CI | *p* |
| *Fixed effects* | | | | | | | | | |
| Intercept | -0.15 | -0.20, -0.11 | <.001 | -0.15 | -0.19, -0.10 | <.001 | -0.15 | -0.20, -0.11 | <.001 |
| Age at baseline | -0.02 | -0.03, -0.004 | .01 | -0.01 | -0.02, 0.01 | .39 | -0.002 | -0.02, 0.01 | .75 |
| Age (time-varying) | 0.01 | 0.01, 0.02 | <.001 | 0.01 | 0.01, 0.02 | <.001 | 0.01 | 0.01, 0.02 | <.001 |
| Retirement WP | 0.11 | 0.09, 0.14 | <.001 | 0.12 | 0.10, 0.14 | <.001 | 0.13 | 0.10, 0.15 | <.001 |
| Retirement BP | 0.21 | 0.11, 0.31 | <.001 | 0.06 | -0.02, 0.14 | .16 | 0.01 | -0.07, 0.08 | .87 |
| Genderd | 0.03 | -0.02, 0.08 | .24 | 0.03 | -0.02, 0.07 | .26 | 0.03 | -0.02, 0.08 | .19 |
| Educatione | 0.11 | 0.06, 0.15 | <.001 | 0.10 | 0.05, 0.15 | <.001 | 0.10 | 0.05, 0.14 | <.001 |
| Relationship statusf | 0.22 | 0.19, 0.26 | <.001 | 0.23 | 0.19, 0.26 | <.001 | 0.23 | 0.19, 0.26 | <.001 |
| Retirement WP × Age | -0.02 | -0.03, -0.01 | <.001 | -0.04 | -0.05, -0.03 | <.001 | -0.04 | -0.05, -0.03 | <.001 |
| Retirement BP × Age | -0.06 | -0.07, -0.05 | <.001 | -0.06 | -0.07, -0.05 | <.001 | -0.05 | -0.06, -0.04 | <.001 |
| *Random effects (SD)* | | | | | | | | | |
| Intercept | 0.84 | | | 0.84 | | | 0.84 | | |
| Age | 0.07 | | | 0.06 | | | 0.06 | | |
| Retirement WP | 0.32 | | | 0.31 | | | 0.30 | | |
| Residual | 0.47 | | | 0.47 | | | 0.47 | | |
| AIC | 62,523.09 | | | 62,460.72 | | | 62,592.28 | | |
| BIC | 62,665.73 | | | 62,603.37 | | | 62,734.92 | | |

*Note*. Dependent variable standardized (z-score) on baseline distribution to facilitate interpretation. WP = within-person effect, BP = between-person effect, AIC = Akaike Information Criterion, BIC =Bayesian Information Criterion, CI = confidence interval. aRetirement defined by transition from 1 to 2/3/4 in the retirement status variable. bRetirement defined by transition from 1/2 to 3/4 in the retirement status variable. cRetirement defined by transition from 1/2/3 to 4 in the retirement status variable. ePrimary/secondary = 0, Tertiary = 1. fNo partner = 0, With partner = 1.

**Table S5**

*Sensitivity analysis with varying definitions of retirement (pension withdrawal, subjective retirement, stop working) in the effects on depressive symptoms*

|  | Depressive symptoms | | | | | | | | |
| --- | --- | --- | --- | --- | --- | --- | --- | --- | --- |
|  | Pension withdrawala | | | Subjective retirementb | | | Stop workingc | | |
|  | Est. | 95% CI | *p* | Est. | 95% CI | *p* | Est. | 95% CI | *p* |
| *Fixed effects* | | | | | | | | | |
| Intercept | 0.22 | 0.17, 0.26 | <.001 | 0.21 | 0.17, 0.26 | <.001 | 0.22 | 0.17, 0.27 | <.001 |
| Age at baseline | -0.01 | -0.02, 0.01 | .43 | -0.01 | -0.03, 0.001 | .08 | -0.02 | -0.03, -0.004 | .01 |
| Age (time-varying) | 0.003 | -0.001, 0.01 | .11 | 0.002 | -0.001, 0.01 | .22 | 0.002 | -0.002, 0.01 | .29 |
| Retirement WP | -0.10 | -0.13, -0.07 | <.001 | -0.11 | -0.13, -0.08 | <.001 | -0.12 | -0.14, -0.09 | <.001 |
| Retirement BP | -0.15 | -0.24, -0.06 | .001 | -0.08 | -0.15, -0.002 | .05 | -0.02 | -0.09, 0.04 | .47 |
| Genderd | 0.08 | 0.04, 0.13 | <.001 | 0.08 | 0.04, 0.13 | <.001 | 0.08 | 0.04, 0.12 | <.001 |
| Educatione | -0.05 | -0.09, -0.01 | .02 | -0.05 | -0.09, -0.01 | .03 | -0.04 | -0.09, 0.001 | .05 |
| Relationship statusf | -0.39 | -0.43, -0.36 | <.001 | -0.39 | -0.43, -0.36 | <.001 | -0.39 | -0.43, -0.36 | <.001 |
| Retirement WP × Age | 0.02 | 0.01, 0.03 | <.001 | 0.04 | 0.03, 0.05 | <.001 | 0.05 | 0.04, 0.05 | <.001 |
| Retirement BP × Age | 0.05 | 0.04, 0.06 | <.001 | 0.05 | 0.04, 0.06 | <.001 | 0.04 | 0.03, 0.04 | <.001 |
| *Random effects (SD)* | | | | | | | | | |
| Intercept | 0.76 | | | 0.76 | | | 0.76 | | |
| Age | 0.06 | | | 0.07 | | | 0.07 | | |
| Retirement WP | 0.33 | | | 0.25 | | | 0.27 | | |
| Residual | 0.54 | | | 0.54 | | | 0.54 | | |
| AIC | 69,068.57 | | | 69,065.06 | | | 69,132.69 | | |
| BIC | 69,211.38 | | | 69,207.87 | | | 69,275.50 | | |

*Note*. Dependent variable standardized (z-score) on baseline distribution to facilitate interpretation. WP = within-person effect, BP = between-person effect, AIC = Akaike Information Criterion, BIC =Bayesian Information Criterion, CI = confidence interval. aRetirement defined by transition from 1 to 2/3/4 in the retirement status variable. bRetirement defined by transition from 1/2 to 3/4 in the retirement status variable. cRetirement defined by transition from 1/2/3 to 4 in the retirement status variable. ePrimary/secondary = 0, Tertiary = 1. fNo partner = 0, With partner = 1.

**Table S6**

*Sensitivity analysis with varying definitions of retirement (pension withdrawal, subjective retirement, stop working) in the effects on disease burden*

|  | Disease burden | | | | | | | | |
| --- | --- | --- | --- | --- | --- | --- | --- | --- | --- |
|  | Pension withdrawala | | | Subjective retirementb | | | Stop workingc | | |
|  | Est. | 95% CI | *p* | Est. | 95% CI | *p* | Est. | 95% CI | *p* |
| *Fixed effects* | | | | | | | | | |
| Intercept | 0.19 | 0.14, 0.24 | <.001 | 0.19 | 0.14, 0.24 | <.001 | 0.19 | 0.14, 0.24 | <.001 |
| Age at baseline | -0.04 | -0.05, -0.02 | <.001 | -0.05 | -0.06, -0.03 | <.001 | -0.05 | -0.06, -0.03 | <.001 |
| Age (time-varying) | 0.04 | 0.04, 0.04 | <.001 | 0.04 | 0.04, 0.04 | <.001 | 0.04 | 0.04, 0.04 | <.001 |
| Retirement WP | -0.05 | -0.07, -0.02 | <.001 | -0.05 | -0.07, -0.03 | <.001 | -0.06 | -0.09, -0.04 | <.001 |
| Retirement BP | -0.02 | -0.13, 0.10 | .77 | 0.09 | 0.00, 0.18 | .05 | 0.12 | 0.04, 0.20 | .003 |
| Genderd | 0.05 | -0.002, 0.10 | .06 | 0.04 | -0.01, 0.10 | .10 | 0.04 | -0.01, 0.09 | .16 |
| Educatione | -0.31 | -0.36, -0.25 | <.001 | -0.30 | -0.35, -0.25 | <.001 | -0.29 | -0.34, -0.24 | <.001 |
| Relationship statusf | -0.06 | -0.10, -0.03 | <.001 | -0.06 | -0.10, -0.03 | <.001 | -0.06 | -0.10, -0.03 | <.001 |
| Retirement WP × Age | 0.01 | -0.001, 0.02 | .08 | 0.02 | 0.01, 0.02 | <.001 | 0.02 | 0.01, 0.03 | <.001 |
| Retirement BP × Age | 0.02 | 0.01, 0.03 | .001 | 0.02 | 0.01, 0.03 | <.001 | 0.01 | 0.01, 0.02 | .002 |
| *Random effects (SD)* | | | | | | | | | |
| Intercept | 0.90 | | | 0.90 | | | 0.90 | | |
| Age | 0.07 | | | 0.07 | | | 0.07 | | |
| Retirement WP | 0.25 | | | 0.24 | | | 0.25 | | |
| Residual | 0.40 | | | 0.40 | | | 0.40 | | |
| AIC | 44,181.11 | | | 44,167.63 | | | 44,231.07 | | |
| BIC | 44,319.30 | | | 44,305.82 | | | 44,369.27 | | |

*Note*. Dependent variable standardized (z-score) on baseline distribution to facilitate interpretation. WP = within-person effect, BP = between-person effect, AIC = Akaike Information Criterion, BIC =Bayesian Information Criterion, CI = confidence interval. aRetirement defined by transition from 1 to 2/3/4 in the retirement status variable. bRetirement defined by transition from 1/2 to 3/4 in the retirement status variable. cRetirement defined by transition from 1/2/3 to 4 in the retirement status variable. ePrimary/secondary = 0, Tertiary = 1. fNo partner = 0, With partner = 1.

**Table S7**

*Sensitivity analysis with varying definitions of retirement (pension withdrawal, subjective retirement, stop working) in the effects on reasoning ability*

|  | Reasoning ability | | | | | | | | |
| --- | --- | --- | --- | --- | --- | --- | --- | --- | --- |
|  | Pension withdrawala | | | Subjective retirementb | | | Stop workingc | | |
|  | Est. | 95% CI | *p* | Est. | 95% CI | *p* | Est. | 95% CI | *p* |
| *Fixed effects* | | | | | | | | | |
| Intercept | -0.02 | -0.07, 0.04 | .61 | -0.02 | -0.08, 0.04 | .50 | -0.02 | -0.08, 0.04 | .48 |
| Age at baseline | -0.13 | -0.15, -0.12 | <.001 | -0.13 | -0.15, -0.12 | <.001 | -0.13 | -0.14, -0.11 | <.001 |
| Age (time-varying) | 0.06 | 0.06, 0.07 | <.001 | 0.06 | 0.06, 0.07 | <.001 | 0.06 | 0.06, 0.07 | <.001 |
| Retirement WP | 0.02 | -0.02, 0.06 | .33 | 0.04 | 0.01, 0.08 | .03 | 0.05 | 0.01, 0.08 | .02 |
| Retirement BP | -0.002 | -0.12, 0.11 | .98 | 0.01 | -0.08, 0.10 | .78 | -0.08 | -0.15, 0.00 | .05 |
| Genderd | -0.23 | -0.27, -0.18 | <.001 | -0.23 | -0.27, -0.18 | <.001 | -0.22 | -0.27, -0.17 | <.001 |
| Educatione | 0.31 | 0.26, 0.35 | <.001 | 0.31 | 0.26, 0.35 | <.001 | 0.30 | 0.25, 0.34 | <.001 |
| Relationship statusf | 0.05 | 0.003, 0.10 | .04 | 0.05 | 0.003, 0.10 | .04 | 0.05 | 0.01, 0.10 | .03 |
| Retirement WP × Age | -0.03 | -0.05, -0.02 | <.001 | -0.03 | -0.04, -0.02 | <.001 | -0.02 | -0.03, -0.01 | .001 |
| Retirement BP × Age | -0.01 | -0.03, 0.01 | .45 | 0.00 | -0.01, 0.02 | .71 | 0.001 | -0.01, 0.01 | .85 |
| *Random effects (SD)* | | | | | | | | | |
| Intercept | 0.68 | | | 0.68 | | | 0.68 | | |
| Age | 0.04 | | | 0.05 | | | 0.05 | | |
| Retirement WP | 0.12 | | | 0.03 | | | 0.12 | | |
| Residual | 0.69 | | | 0.69 | | | 0.69 | | |
| AIC | 53,282.39 | | | 53,282.70 | | | 53,353.59 | | |
| BIC | 53,418.23 | | | 53,418.54 | | | 53,489.44 | | |

*Note*. Dependent variable standardized (z-score) on baseline distribution to facilitate interpretation. WP = within-person effect, BP = between-person effect, AIC = Akaike Information Criterion, BIC =Bayesian Information Criterion, CI = confidence interval. aRetirement defined by transition from 1 to 2/3/4 in the retirement status variable. bRetirement defined by transition from 1/2 to 3/4 in the retirement status variable. cRetirement defined by transition from 1/2/3 to 4 in the retirement status variable. ePrimary/secondary = 0, Tertiary = 1. fNo partner = 0, With partner = 1.

**Table S8**

*Sensitivity analysis with varying definitions of retirement (pension withdrawal, subjective retirement, stop working) in the effects on memory*

|  | Memory | | | | | | | | |
| --- | --- | --- | --- | --- | --- | --- | --- | --- | --- |
|  | Pension withdrawala | | | Subjective retirementb | | | Stop workingc | | |
|  | Est. | 95% CI | *p* | Est. | 95% CI | *p* | Est. | 95% CI | *p* |
| *Fixed effects* | | | | | | | | | |
| Intercept | -0.02 | -0.07, 0.04 | .59 | -0.02 | -0.08, 0.04 | .52 | -0.02 | -0.08, 0.04 | .54 |
| Age at baseline | -0.09 | -0.11, -0.08 | <.001 | -0.09 | -0.11, -0.08 | <.001 | -0.09 | -0.10, -0.07 | <.001 |
| Age (time-varying) | 0.07 | 0.07, 0.08 | <.001 | 0.07 | 0.06, 0.08 | <.001 | 0.07 | 0.07, 0.08 | <.001 |
| Retirement WP | 0.01 | -0.03, 0.05 | .61 | 0.08 | 0.04, 0.12 | <.001 | 0.08 | 0.04, 0.12 | <.001 |
| Retirement BP | 0.04 | -0.06, 0.15 | .42 | 0.10 | 0.01, 0.18 | .02 | 0.05 | -0.02, 0.13 | .16 |
| Genderd | 0.19 | 0.14, 0.24 | <.001 | 0.19 | 0.14, 0.23 | <.001 | 0.19 | 0.15, 0.24 | <.001 |
| Educatione | 0.25 | 0.20, 0.29 | <.001 | 0.25 | 0.21, 0.30 | <.001 | 0.25 | 0.20, 0.29 | <.001 |
| Relationship statusf | 0.003 | -0.05, 0.05 | .89 | 0.004 | -0.05, 0.05 | .88 | 0.004 | -0.04, 0.05 | .86 |
| Retirement WP × Age | -0.05 | -0.07, -0.04 | <.001 | -0.05 | -0.06, -0.03 | <.001 | -0.05 | -0.06, -0.04 | <.001 |
| Retirement BP × Age | -0.01 | -0.03, 0.01 | .17 | -0.01 | -0.02, 0.01 | .18 | -0.02 | -0.03, -0.003 | .02 |
| *Random effects (SD)* | | | | | | | | | |
| Intercept | 0.70 | | | 0.69 | | | 0.70 | | |
| Age | 0.07 | | | 0.07 | | | 0.06 | | |
| Retirement WP | 0.05 | | | 0.14 | | | 0.03 | | |
| Residual | 0.66 | | | 0.66 | | | 0.66 | | |
| AIC | 43,650.35 | | | 43,641.49 | | | 43,704.08 | | |
| BIC | 43,782.59 | | | 43,773.73 | | | 43,836.32 | | |

*Note*. Dependent variable standardized (z-score) on baseline distribution to facilitate interpretation. WP = within-person effect, BP = between-person effect, AIC = Akaike Information Criterion, BIC =Bayesian Information Criterion, CI = confidence interval. aRetirement defined by transition from 1 to 2/3/4 in the retirement status variable. bRetirement defined by transition from 1/2 to 3/4 in the retirement status variable. cRetirement defined by transition from 1/2/3 to 4 in the retirement status variable. ePrimary/secondary = 0, Tertiary = 1. fNo partner = 0, With partner = 1.

**Table S9**

*Interaction effects of retirement and age by job satisfaction on life satisfaction, quality of life, depressive symptoms, disease burden, reasoning ability, and memory*

|  | Life satisfaction | | | Quality of life | | | Depressive symptoms | | | Disease burden | | | Reasoning ability | | | Memory | | |
| --- | --- | --- | --- | --- | --- | --- | --- | --- | --- | --- | --- | --- | --- | --- | --- | --- | --- | --- |
|  | Est. | 95% CI | *p* | Est. | 95% CI | *p* | Est. | 95% CI | *p* | Est. | 95% CI | *p* | Est. | 95% CI | *p* | Est. | 95% CI | *p* |
| *Fixed effects* | | | | | | | | | | | | | | | | | | |
| Intercept | -0.19 | -0.24, -0.14 | <.001 | -0.03 | -0.09, 0.02 | .23 | 0.10 | 0.04, 0.15 | <.001 | 0.12 | 0.06, 0.18 | <.001 | 0.01 | -0.06, 0.08 | .76 | 0.04 | -0.03, 0.11 | .26 |
| Age at baseline | -0.06 | -0.07, -0.04 | <.001 | -0.05 | -0.06, -0.03 | <.001 | 0.02 | 0.00, 0.03 | .01 | -0.04 | -0.05, -0.02 | <.001 | -0.13 | -0.15, -0.11 | <.001 | -0.1 | -0.12, -0.08 | <.001 |
| Age (time-varying) | 0.02 | 0.02, 0.03 | <.001 | 0.01 | 0.01, 0.01 | <.001 | 0.01 | 0.00, 0.01 | .04 | 0.04 | 0.04, 0.05 | <.001 | 0.06 | 0.05, 0.07 | <.001 | 0.07 | 0.06, 0.07 | <.001 |
| Retirement WP | 0.04 | 0.03, 0.05 | <.001 | 0.04 | 0.03, 0.05 | <.001 | -0.04 | -0.05, -0.03 | <.001 | -0.02 | -0.03, -0.01 | <.001 | 0.01 | -0.00, 0.03 | .10 | 0.03 | 0.01, 0.04 | <.001 |
| Retirement BP | 0.12 | 0.09, 0.15 | <.001 | 0.09 | 0.05, 0.12 | <.001 | -0.08 | -0.11, -0.04 | <.001 | 0.01 | -0.03, 0.05 | .60 | -0.01 | -0.05, 0.04 | .79 | 0.05 | 0.01, 0.09 | .01 |
| Gendera | 0.02 | -0.03, 0.06 | .51 | 0.02 | -0.03, 0.07 | .36 | 0.08 | 0.03, 0.12 | .001 | -0.01 | -0.06, 0.05 | .80 | -0.23 | -0.29, -0.18 | <.001 | 0.17 | 0.11, 0.22 | <.001 |
| Educationb | 0.05 | 0.00, 0.10 | .04 | 0.05 | -0.00, 0.10 | .06 | 0.01 | -0.04, 0.05 | .75 | -0.25 | -0.31, -0.19 | <.001 | 0.32 | 0.27, 0.38 | <.001 | 0.28 | 0.23, 0.34 | <.001 |
| Relationship statusc | 0.32 | 0.28, 0.35 | <.001 | 0.17 | 0.13, 0.21 | <.001 | -0.32 | -0.36, -0.28 | <.001 | -0.04 | -0.08, -0.00 | .03 | 0.04 | -0.02, 0.09 | .16 | -0.04 | -0.09, 0.02 | .22 |
| Retirement WP × Age | -0.004 | -0.01, -0.00 | .01 | -0.01 | -0.01, -0.01 | <.001 | 0.01 | 0.01, 0.01 | <.001 | 0.01 | 0.00, 0.01 | .01 | -0.01 | -0.02, -0.01 | <.001 | -0.02 | -0.03, -0.02 | <.001 |
| Retirement BP × Age | -0.01 | -0.02, -0.01 | <.001 | -0.02 | -0.02, -0.02 | <.001 | 0.01 | 0.01, 0.02 | <.001 | 0.01 | 0.00, 0.01 | .01 | -0.004 | -0.01, 0.00 | .31 | -0.01 | -0.02, -0.00 | .004 |
| Job satisfaction | 0.31 | 0.28, 0.33 | <.001 | 0.34 | 0.31, 0.36 | <.001 | -0.26 | -0.28, -0.23 | <.001 | -0.16 | -0.18, -0.13 | <.001 | -0.004 | -0.03, 0.03 | .79 | 0.01 | -0.02, 0.04 | .51 |
| Job satisfaction × Age | 0.002 | -0.00, 0.01 | .29 | -0.002 | -0.01, 0.00 | .35 | 0.001 | -0.00, 0.01 | .59 | 0.001 | -0.00, 0.01 | .57 | -0.001 | -0.01, 0.01 | .83 | -0.001 | -0.01, 0.01 | .80 |
| Job satisfaction × Retirement WP | -0.03 | -0.04, -0.02 | <.001 | -0.03 | -0.04, -0.02 | <.001 | 0.03 | 0.02, 0.04 | <.001 | 0.01 | -0.00, 0.02 | .12 | 0.002 | -0.01, 0.02 | .79 | 0.01 | -0.01, 0.02 | .35 |
| Job satisfaction × Age × Retirement WP | 0.001 | -0.00, 0.00 | .62 | -0.001 | -0.00, 0.00 | .35 | <0.001 | -0.00, 0.00 | .89 | <0.001 | -0.00, 0.00 | .82 | <0.001 | -0.01, 0.01 | .92 | -0.002 | -0.01, 0.00 | .52 |
| *Random effects (SD)* | | | | | | | | | | | | | | | | | | |
| Intercept | 0.72 | | | 0.73 | | | 0.66 | | | 0.82 | | | 0.68 | | | 0.68 | | |
| Age | 0.06 | | | 0.06 | | | 0.06 | | | 0.06 | | | 0.06 | | | 0.06 | | |
| Retirement WP | 0.12 | | | 0.12 | | | 0.11 | | | 0.10 | | | 0.08 | | | 0.02 | | |
| Residual | 0.48 | | | 0.47 | | | 0.53 | | | 0.39 | | | 0.68 | | | 0.66 | | |
| AIC | 45,706.62 | | | 43,889.84 | | | 48,288.58 | | | 31,641.76 | | | 39,938.55 | | | 31,969.39 | | |
| BIC | 45,876.77 | | | 44,059.39 | | | 48,458.36 | | | 31,806.24 | | | 40,100.40 | | | 32,126.43 | | |
| *N* / observations | 3,877 / 24,408 | | | 3,862 / 23,716 | | | 3,910 / 23,973 | | | 3,715 / 18,623 | | | 3,225 / 16,434 | | | 3,365 / 13,072 | | |

*Note*. Dependent variables standardized (z-score) on baseline distribution to facilitate interpretation. WP = within-person effect, BP = between-person effect, AIC = Akaike Information Criterion, BIC =Bayesian Information Criterion, CI = confidence interval. aMale = 0, Female = 1. bPrimary/secondary = 0, Tertiary = 1. cNo partner = 0, With partner = 1.

**Table S10**

*Interaction effects of retirement and age by involuntary transition on life satisfaction, quality of life, depressive symptoms, disease burden, reasoning ability, and memory*

|  | Life satisfaction | | | Quality of life | | | Depressive symptoms | | | Disease burden | | | Reasoning ability | | | Memory | | |
| --- | --- | --- | --- | --- | --- | --- | --- | --- | --- | --- | --- | --- | --- | --- | --- | --- | --- | --- |
|  | Est. | 95% CI | *p* | Est. | 95% CI | *p* | Est. | 95% CI | *p* | Est. | 95% CI | *p* | Est. | 95% CI | *p* | Est. | 95% CI | *p* |
| *Fixed effects* | | | | | | | | | | | | | | | | | | |
| Intercept | -0.07 | -0.12, -0.02 | .01 | 0.05 | -0.00, 0.11 | .06 | 0.02 | -0.03, 0.07 | .502 | 0.01 | -0.05, 0.07 | .68 | 0.01 | -0.05, 0.08 | .68 | 0.02 | -0.04, 0.09 | .51 |
| Age at baseline | -0.01 | -0.03, 0.00 | .08 | -0.003 | -0.02, 0.01 | .71 | -0.02 | -0.03, -0.00 | .028 | -0.06 | -0.08, -0.04 | <.001 | -0.12 | -0.14, -0.10 | <.001 | -0.08 | -0.10, -0.07 | <.001 |
| Age (time-varying) | 0.02 | 0.01, 0.02 | <.001 | 0.01 | 0.00, 0.01 | <.001 | 0.01 | 0.00, 0.01 | .001 | 0.04 | 0.04, 0.05 | <.001 | 0.06 | 0.05, 0.06 | <.001 | 0.07 | 0.06, 0.08 | <.001 |
| Retirement WP | 0.05 | 0.04, 0.06 | <.001 | 0.05 | 0.04, 0.06 | <.001 | -0.05 | -0.07, -0.04 | <.001 | -0.03 | -0.04, -0.02 | <.001 | 0.02 | 0.01, 0.04 | .01 | 0.03 | 0.01, 0.04 | .002 |
| Retirement BP | 0.08 | 0.04, 0.12 | <.001 | 0.03 | -0.01, 0.07 | .21 | -0.02 | -0.05, 0.02 | .36 | 0.07 | 0.03, 0.12 | .002 | -0.04 | -0.08, 0.00 | .07 | -0.01 | -0.05, 0.04 | .83 |
| Gendera | 0.03 | -0.01, 0.08 | .15 | 0.06 | 0.01, 0.11 | .02 | 0.06 | 0.01, 0.10 | .01 | 0.02 | -0.03, 0.08 | .44 | -0.23 | -0.28, -0.18 | <.001 | 0.19 | 0.14, 0.24 | <.001 |
| Educationb | 0.08 | 0.03, 0.12 | .002 | 0.06 | 0.01, 0.11 | .01 | -0.03 | -0.07, 0.02 | .28 | -0.26 | -0.32, -0.21 | <.001 | 0.3 | 0.25, 0.35 | <.001 | 0.24 | 0.19, 0.29 | <.001 |
| Relationship statusc | 0.31 | 0.27, 0.35 | <.001 | 0.19 | 0.15, 0.22 | <.001 | -0.35 | -0.39, -0.31 | <.001 | -0.04 | -0.08, -0.01 | .02 | 0.05 | 0.00, 0.10 | .04 | 0.003 | -0.05, 0.06 | .91 |
| Retirement WP × Age | -0.01 | -0.01, -0.00 | .003 | -0.01 | -0.02, -0.01 | <.001 | 0.01 | 0.01, 0.02 | <.001 | 0.01 | 0.00, 0.01 | .01 | -0.01 | -0.02, -0.00 | .002 | -0.02 | -0.02, -0.01 | <.001 |
| Retirement BP × Age | -0.01 | -0.02, -0.01 | <.001 | -0.02 | -0.02, -0.02 | <.001 | 0.02 | 0.01, 0.02 | <.001 | 0.004 | -0.00, 0.01 | .10 | 0.01 | -0.00, 0.01 | .16 | -0.001 | -0.01, 0.01 | .81 |
| Involuntary transition | -0.48 | -0.52, -0.44 | <.001 | -0.51 | -0.55, -0.47 | <.001 | 0.47 | 0.43, 0.51 | <.001 | 0.44 | 0.40, 0.49 | <.001 | -0.07 | -0.12, -0.02 | .007 | -0.04 | -0.09, 0.01 | .09 |
| Involuntary transition × Age | 0.01 | 0.00, 0.02 | .004 | 0.01 | -0.00, 0.01 | .12 | -0.01 | -0.02, -0.01 | <.001 | <.001 | -0.01, 0.00 | .32 | <.001 | -0.01, 0.01 | .94 | -0.01 | -0.02, -0.00 | .02 |
| Involuntary transition × Retirement WP | -0.04 | -0.06, -0.03 | <.001 | -0.03 | -0.04, -0.01 | <.001 | 0.04 | 0.02, 0.05 | <.001 | 0.03 | 0.01, 0.04 | .001 | -0.01 | -0.04, 0.01 | .38 | -0.004 | -0.03, 0.02 | .74 |
| Involuntary transition × Age × Retirement WP | 0.003 | -0.00, 0.01 | .25 | -0.003 | -0.01, 0.00 | .26 | 0.004 | -0.00, 0.01 | .18 | <.001 | -0.01, 0.01 | .96 | <.001 | -0.01, 0.01 | .99 | -0.01 | -0.02, 0.00 | .15 |
| *Random effects (SD)* | | | | | | | | | | | | | | | | | | |
| Intercept | 0.77 | | | 0.78 | | | 0.71 | | | 0.86 | | | 0.69 | | | 0.71 | | |
| Age | 0.07 | | | 0.06 | | | 0.07 | | | 0.07 | | | 0.05 | | | 0.07 | | |
| Retirement WP | 0.12 | | | 0.12 | | | 0.12 | | | 0.10 | | | 0.06 | | | 0.01 | | |
| Residual | 0.48 | | | 0.47 | | | 0.54 | | | 0.40 | | | 0.69 | | | 0.66 | | |
| AIC | 56,738.19 | | | 54,087.10 | | | 60,019.34 | | | 38,546.58 | | | 47,648.33 | | | 38,201.62 | | |
| BIC | 56,912.45 | | | 54,260.74 | | | 60,193.10 | | | 38,714.71 | | | 47,813.80 | | | 38,362.27 | | |
| *N* / observations | 4,518 / 29,673 | | | 4,514 / 28,816 | | | 4,526 / 28,979 | | | 4,360 / 22,168 | | | 3,791 / 19,522 | | | 3,871 / 15,522 | | |

*Note*. Dependent variables standardized (z-score) on baseline distribution to facilitate interpretation. WP = within-person effect, BP = between-person effect, AIC = Akaike Information Criterion, BIC =Bayesian Information Criterion, CI = confidence interval. aMale = 0, Female = 1. bPrimary/secondary = 0, Tertiary = 1. cNo partner = 0, With partner = 1.
